# Supplementary material for: D-type cyclins control cell division and developmental rate during Arabidopsis seed development
Source: PubMed Central journal article supplement — J Exp Bot. 2012 Mar 12;63(10):3571–86. doi: 10.1093/jxb/ers015 (PMC3388828; doi:10.1093/jxb/ers015), 2012-03-12
Supplement: supp_ers015_00073445-file002.pdf [file supp_ers015_00073445-file002.pdf]

## D-type cyclins control cell division and developmental rate during Arabidopsis seed development

Carl Collins, Walter Dewitte and James A. H. Murray

**Table S1.** Frequencies of phenotypic classes in  $P_{RPS5A}>>CYCD3;1$  seeds (from Table 4).

| HAP | Phenotypic classes                                | Developmental stage <sup>a</sup> |            |       |
|-----|---------------------------------------------------|----------------------------------|------------|-------|
|     |                                                   | Globular                         | Transition | Heart |
| 96  | Class 1: Suspensor overproliferation              | 44%                              | 70%        | 67%   |
|     | Class 2: Suspensor/basal embryo overproliferation | 20%                              | 0%         | 0%    |
|     | Class 3: Basal embryo overproliferation           | 4%                               | 0%         | 0%    |
|     | Wild type-looking                                 | 32%                              | 30%        | 33%   |
|     | Total:                                            | 100%                             | 100%       | 100%  |
| 120 | Class 1: Suspensor overproliferation              | 52%                              | 63%        | 72%   |
|     | Class 2: Suspensor/basal embryo overproliferation | 20%                              | 14%        | 0%    |
|     | Class 3: Basal embryo overproliferation           | 10%                              | 0%         | 0%    |
|     | Wild type-looking                                 | 18%                              | 23%        | 28%   |
|     | Total:                                            | 100%                             | 100%       | 100%  |
| 168 | Class 1: Suspensor overproliferation              | 65%                              | 55%        | 71%   |
|     | Class 2: Suspensor/basal embryo overproliferation | 30%                              | 22%        | 0%    |
|     | Class 3: Basal embryo overproliferation           | 5%                               | 0%         | 0%    |
|     | Wild type-looking                                 | 0%                               | 23%        | 29%   |
|     | Total:                                            | 100%                             | 100%       | 100%  |
| 216 | Class 1: Suspensor overproliferation              | 60%                              | 100%       | 80%   |
|     | Class 2: Suspensor/basal embryo overproliferation | 24%                              | 0%         | 0%    |
|     | Class 3: Basal embryo overproliferation           | 16%                              | 0%         | 0%    |
|     | Wild type-looking                                 | 0%                               | 0%         | 20%   |
|     | Total:                                            | 100%                             | 100%       | 100%  |

Approximately 150 seeds were analysed at each time point.  $P_{RPS5A}>>CYCD3;1$  embryos were from ACT *RPS5A* plants pollinated using EF *CYCD3;1* plants as pollen parents.

HAP, Hours after pollination.

<sup>a</sup>Does not include abnormal torpedo stage embryos.

**Table S2.** Frequencies of phenotypic classes in  $P_{RPS5A}>>CYCD7;1$  seeds (from Table 4).

| HAP | Phenotypic classes | Developmental stage <sup>a</sup> |                 |       |         |                |        |
|-----|--------------------|----------------------------------|-----------------|-------|---------|----------------|--------|
|     |                    | Globular                         | Transition      | Heart | Torpedo | Bent cotyledon | Mature |
| 120 | Class 1:           | 27%                              | 8%              | 20%   | 0%      |                |        |
|     | Class 2:           | 23%                              | 45%             | 45%   | 0%      |                |        |
|     | Class 3:           | 0%                               | 0%              | 0%    | 0%      |                |        |
|     | Class 4:           | 0%                               | 0%              | 0%    | 0%      |                |        |
|     | Wild type:         | 50%                              | 47%             | 35%   | 100%    |                |        |
|     | Total:             | 100%                             | 100%            | 100%  | 100%    |                |        |
| 168 | Class 1:           | 39%                              | 0%              | 0%    | 0%      | 0%             |        |
|     | Class 2:           | 61%                              | 0%              | 68%   | 0%      | 0%             |        |
|     | Class 3:           | 0%                               | 0%              | 0%    | 0%      | 46%            |        |
|     | Class 4:           | 0%                               | 0%              | 0%    | 0%      | 10%            |        |
|     | Wild type:         | 0%                               | 100%            | 32%   | 100%    | 44%            |        |
|     | Total:             | 100%                             | 100%            | 100%  | 100%    | 100%           |        |
| 216 | Class 1:           | 65%                              | NA <sup>b</sup> | 0%    | 0%      | 0%             | 0%     |
|     | Class 2:           | 30%                              | NA              | 100%  | 63%     | 0%             | 0%     |
|     | Class 3:           | 5%                               | NA              | 0%    | 0%      | 36%            | 39%    |
|     | Class 4:           | 0%                               | NA              | 0%    | 0%      | 0%             | 33%    |
|     | Wild type:         | 0%                               | NA              | 0%    | 37%     | 64%            | 28%    |
|     | Total:             | 100%                             | 100%            | 100%  | 100%    | 100%           | 100%   |

Approximately 150 seeds were analysed at each time point.  $P_{RPS5A}>>CYCD7;1$  seeds were from self-pollinated  $P_{RPS5A}>>CYCD7;1$  plants homozygous for ACT  $RPS5A$  and EF  $CYCD7;1$  constructs.

HAP, Hours after pollination.

Class 1: Enlarged embryo

Class 2: Enlarged embryo and reduced endosperm

Class 3: Reduced endosperm/final seed size

Class 4: Enlarged endosperm/final seed size

Wild type: normal, wild type-looking

<sup>a</sup>Developmental stages prior to globular are not shown as phenotypes were all wild type-looking.

<sup>b</sup>NA, not applicable. This embryonic stage was not observed at this time point.
